# Supplementary material for: Sex-Determination Mechanisms among Populations within Cryptic Species Complex of Calotes (Squamata: Agamidae: Draconinae)
Source: MDPI journal article supplement (doi:10.3390/dna1020006), 2021-10-06
Supplement: s1 [file s1]

**Table S1: Number of presence-absence markers (100% concordant) in *C. versicolor* per restriction enzyme combinations.** \* Number of individuals where data was available and '-' denotes where no data was available for sex-linked marker analyses.

| Population      | Enzyme combination          | Male Specific | Female Specific | Number of Individuals * |        | Enzyme Combination           | Male Specific | Female Specific | Number of Individuals Worked Out |        |
|-----------------|-----------------------------|---------------|-----------------|-------------------------|--------|------------------------------|---------------|-----------------|----------------------------------|--------|
|                 |                             |               |                 | Male                    | Female |                              |               |                 | Male                             | Female |
| BD_DHK - BD_FEN | <i>Sbf</i> I- <i>Hpa</i> II | 0             | 0               | 12                      | 13     | <i>Pst</i> II- <i>Hpa</i> II | 14            | 8               | 5                                | 3      |
|                 | <i>Sbf</i> I- <i>Msp</i> I  | 20            | 32              | 4                       | 4      | <i>Pst</i> II- <i>Msp</i> I  | 0             | 0               | 9                                | 9      |
| BD_DHK          | <i>Sbf</i> I- <i>Hpa</i> II | 0             | 0               | 8                       | 8      | <i>Pst</i> II- <i>Hpa</i> II | 14            | 8               | 5                                | 3      |
|                 | <i>Sbf</i> I- <i>Msp</i> I  | 521           | 2,451           | 3                       | 1      | <i>Pst</i> II- <i>Msp</i> I  | 0             | 0               | 6                                | 7      |
| BD_FEN          | <i>Sbf</i> I- <i>Hpa</i> II | 37            | 7               | 4                       | 5      | <i>Pst</i> II- <i>Hpa</i> II | -             | -               | -                                | -      |
|                 | <i>Sbf</i> I- <i>Msp</i> I  | 187           | 108             | 1                       | 3      | <i>Pst</i> II- <i>Msp</i> I  | 646           | 995             | 3                                | 2      |
| BD_HBJ          | <i>Sbf</i> I- <i>Hpa</i> II | 96            | 16              | 2                       | 5      | <i>Pst</i> II- <i>Hpa</i> II | -             | -               | -                                | -      |
|                 | <i>Sbf</i> I- <i>Msp</i> I  | -             | -               | -                       | -      | <i>Pst</i> II- <i>Msp</i> I  | 21            | 17              | 3                                | 5      |
| TL_CAV          | <i>Sbf</i> I- <i>Hpa</i> II | 0             | 0               | 6                       | 5      | <i>Pst</i> II- <i>Hpa</i> II | -             | -               | -                                | -      |
|                 | <i>Sbf</i> I- <i>Msp</i> I  | -             | -               | -                       | -      | <i>Pst</i> II- <i>Msp</i> I  | 0             | 0               | 6                                | 5      |
